# Supplementary material for: Modifier genes in SCN1A‐related epilepsy syndromes
Source: PubMed Central journal article supplement (PMC7196470; doi:10.1002/mgg3.1103), 2020-02-07
Supplement: MGG3-8-e1103-s003.pdf [file MGG3-8-e1103-s003.pdf]

## 2. Characteristics of epilepsy genes, ID genes and control sets 1-4

| <b>Gene set</b>       | <b>Average z-score missense</b> | <b>Average pLI LoF</b> | <b>Average number of exons</b> | <b>Average number of coding basepairs</b> | <b>% of genes pLI &gt;= 0.9</b> | <b>Total number of coding basepairs</b> |
|-----------------------|---------------------------------|------------------------|--------------------------------|-------------------------------------------|---------------------------------|-----------------------------------------|
| <b>Epilepsy genes</b> | 2.305                           | 0.596                  | 16.5                           | 2559                                      | 47.5                            | 1080053                                 |
| <b>Control 1</b>      | 0.891                           | 0.359                  | 13.4                           | 1962                                      | 26.4                            | 700293                                  |
| <b>Control 2</b>      | 1.409                           | 0.469                  | 16.9                           | 2506                                      | 36.7                            | 273194                                  |
| <b>Control 3</b>      | 0.409                           | 0.263                  | 17.3                           | 2679                                      | 21.1                            | 597507                                  |
| <b>Control 4</b>      | 0.635                           | 0.297                  | 14.3                           | 2031                                      | 21.1                            | 603202                                  |
| <b>ID genes</b>       | 1.293                           | 0.395                  | 15.1                           | 2404                                      | 32.3                            | 1576863                                 |
