# Supplementary material for: Modifier genes in SCN1A‐related epilepsy syndromes
Source: PubMed Central journal article supplement (PMC7196470; doi:10.1002/mgg3.1103), 2020-02-07
Supplement: MGG3-8-e1103-s004.pdf [file MGG3-8-e1103-s004.pdf]

### 3. Coverage of epilepsy genes, ID genes and control sets 1-4 in the current cohort

| <b>Gene set</b>       | <b>Average coverage complete cohort</b> | <b>% of basepairs &gt;20X complete cohort</b> | <b>Average coverage extreme patients</b> | <b>% of basepairs &gt;20X extreme patients</b> | <b>Average coverage intermediate patients</b> | <b>% of basepairs &gt;20X intermediate patients</b> |
|-----------------------|-----------------------------------------|-----------------------------------------------|------------------------------------------|------------------------------------------------|-----------------------------------------------|-----------------------------------------------------|
| <b>Epilepsy genes</b> | 98.0                                    | 95.6                                          | 102.9                                    | 95.7                                           | 85.7                                          | 94.8                                                |
| <b>Control 1</b>      | 96.3                                    | 93.9                                          | 101.0                                    | 93.9                                           | 83.9                                          | 93.1                                                |
| <b>Control 2</b>      | 99.2                                    | 97.0                                          | 104.1                                    | 97.0                                           | 86.8                                          | 96.4                                                |
| <b>Control 3</b>      | 96.6                                    | 95.2                                          | 101.3                                    | 95.2                                           | 84.6                                          | 94.5                                                |
| <b>Control 4</b>      | 98.6                                    | 96.7                                          | 103.5                                    | 96.8                                           | 86.2                                          | 96.0                                                |
| <b>ID genes</b>       | 100.3                                   | 95.9                                          | 105.3                                    | 96.0                                           | 87.6                                          | 95.2                                                |
