# Supplementary material for: Modifier genes in SCN1A‐related epilepsy syndromes
Source: PubMed Central journal article supplement (PMC7196470; doi:10.1002/mgg3.1103), 2020-02-07
Supplement: MGG3-8-e1103-s005.pdf [file MGG3-8-e1103-s005.pdf]

#### 4. Coverage of epilepsy genes, ID genes and control sets 1-4 in the ExAC database

| <b>Gene set</b>       | <b>Average coverage ExAC</b> | <b>Median coverage ExAC</b> |
|-----------------------|------------------------------|-----------------------------|
| <b>Epilepsy genes</b> | 53.2                         | 55.0                        |
| <b>Control 1</b>      | 53.4                         | 55.5                        |
| <b>Control 2</b>      | 55.5                         | 58.7                        |
| <b>Control 3</b>      | 54.8                         | 57.6                        |
| <b>Control 4</b>      | 54.9                         | 57.1                        |
| <b>ID genes</b>       | 53.5                         | 55.8                        |
