# Supplementary material for: Modifier genes in SCN1A‐related epilepsy syndromes
Source: PubMed Central journal article supplement (PMC7196470; doi:10.1002/mgg3.1103), 2020-02-07
Supplement: MGG3-8-e1103-s007.pdf [file MGG3-8-e1103-s007.pdf]

6. Overview of previously described candidate modifier genes and variants in them detected in the current cohort

| Previously described candidate gene | Described effect                                                                                                                | Reference                   | Number of variants (CADD <sup>a</sup> >20) in current cohort                                   |                                                   |                     |                                            |                     |
|-------------------------------------|---------------------------------------------------------------------------------------------------------------------------------|-----------------------------|------------------------------------------------------------------------------------------------|---------------------------------------------------|---------------------|--------------------------------------------|---------------------|
|                                     |                                                                                                                                 |                             | Variants in only mild or severe member of families with varying phenotypes (MAF<0.01, CADD>20) | Type A variants (MAF <sup>b</sup> <0.01, CADD>20) |                     | Type D variants (MAF<0.5, all CADD scores) |                     |
|                                     |                                                                                                                                 |                             |                                                                                                | Mild patients (n)                                 | Severe patients (n) | Mild patients (n)                          | Severe patients (n) |
| <b>SCN9A</b>                        | Pathogenic variants present in multiple Dravet syndrome patients                                                                | Singh 2009                  |                                                                                                | 1                                                 | 2                   | 2                                          | 3                   |
| <b>SCN8A</b>                        | SCN8A pathogenic variants rescue SCN1A-phenotype in mice; increased resistance for induces seizures in mice with GEFS+ variants | Martin, 2007; Hawkins, 2012 |                                                                                                | 1                                                 |                     | 1                                          | 1                   |
| <b>HLF</b>                          | Decreased survival in HLF/SCN1A double knockout mice                                                                            | Hawkins, 2016               |                                                                                                |                                                   |                     |                                            |                     |
| <b>POLG</b>                         | POLG variants may increase susceptibility to focal brain injury during prolonged seizures in Dravet syndrome                    | Gaily,2013                  |                                                                                                |                                                   | 1                   |                                            | 4                   |
| <b>CACNB4</b>                       | Pathogenic variant in Dravet syndrome patient who died after status epilepticus                                                 | Ohmori, 2008                |                                                                                                |                                                   |                     |                                            |                     |
| <b>CACNA1G</b>                      | Decreased Cacna1g expression led to partial amelioration in SCN1A+/- mice                                                       | Calhoun, 2017               |                                                                                                |                                                   | 1                   | 2                                          | 2                   |
| <b>CACNA1A</b>                      | More severe phenotype in Dravet syndrome patients who also have CACNA1A variants                                                | Ohmori, 2013                |                                                                                                |                                                   | 1                   |                                            | 3                   |

|                                                |                                                                                                                                                   |                             |                                                                                 |   |   |   |   |
|------------------------------------------------|---------------------------------------------------------------------------------------------------------------------------------------------------|-----------------------------|---------------------------------------------------------------------------------|---|---|---|---|
| <b>GABRA2</b>                                  | Potential candidate gene at locus linked to premature lethality in Scn1a+/- mice                                                                  | Miller, 2014                |                                                                                 |   |   |   |   |
| <b>GABRG3</b>                                  | “ “                                                                                                                                               | Miller, 2014                |                                                                                 |   |   | 1 |   |
| <b>GABRB3</b>                                  | “ “                                                                                                                                               | Miller, 2014                |                                                                                 |   |   |   |   |
| <b>GABRA6</b>                                  | “ “                                                                                                                                               | Miller, 2014                |                                                                                 | 1 |   | 2 | 2 |
| <b>GABRB2</b>                                  | “ “                                                                                                                                               | Miller, 2014                |                                                                                 |   |   |   | 1 |
| <b>CACNA1A</b>                                 | “ “                                                                                                                                               | Miller, 2014                |                                                                                 |   |   |   |   |
| <b>CACNA2D1</b>                                | “ “                                                                                                                                               | Miller, 2014                |                                                                                 |   |   |   | 1 |
| <b>CLCN3</b>                                   | “ “                                                                                                                                               | Miller, 2014                |                                                                                 |   |   |   |   |
| <b>KCNJ11</b>                                  | “ “                                                                                                                                               | Miller, 2014                |                                                                                 |   |   | 1 |   |
| <b>ATP1A3</b>                                  | “ “                                                                                                                                               | Miller, 2014                |                                                                                 |   | 1 |   | 2 |
| <b>LGI2</b>                                    | “ “                                                                                                                                               | Miller, 2014                |                                                                                 |   |   |   | 2 |
| <b>MAPK10</b>                                  | “ “                                                                                                                                               | Miller, 2014                |                                                                                 |   |   |   |   |
| <b>RELN</b>                                    | “ “                                                                                                                                               | Miller, 2014                |                                                                                 |   |   |   | 3 |
| <b>SLC7A10</b>                                 | “ “                                                                                                                                               | Miller, 2014                |                                                                                 |   |   | 1 |   |
| <b>KCNQ2</b>                                   | Variants present in 3/12 severe Dravet syndrome patients, not in mild patients; More severe phenotype in GEFS+ mice that also carry KCNQ2 variant | Hammer, 2017; Hakwins, 2012 |                                                                                 |   |   | 1 | 3 |
| <b>SCN2A</b>                                   | More severe phenotype in GEFS+ mice that also carry SCN2A variant                                                                                 | Hawkins, 2012               |                                                                                 |   | 1 |   | 1 |
| <b>Top ranking EE genes in common epilepsy</b> |                                                                                                                                                   |                             |                                                                                 |   |   |   |   |
| <b>DEPDC5</b>                                  | Enriched in common epilepsies                                                                                                                     | Epi4K consortium, 2017      | 2 variants in more severe brother of family 3; both are however mildly affected |   |   | 4 | 5 |
| <b>LGI1</b>                                    | “ “                                                                                                                                               | Epi4K consortium, 2017      |                                                                                 |   |   |   |   |
| <b>PCDH19</b>                                  | “ “                                                                                                                                               | Epi4K consortium,           |                                                                                 |   |   |   |   |

|               |                               |                        |                                                                                 |  |  |   |   |
|---------------|-------------------------------|------------------------|---------------------------------------------------------------------------------|--|--|---|---|
|               |                               | 2017                   |                                                                                 |  |  |   |   |
| <b>GRIN2A</b> | “ “                           | Epi4K consortium, 2017 |                                                                                 |  |  |   | 2 |
| <b>KCNA2</b>  | “ “                           | Epi4K consortium, 2017 |                                                                                 |  |  | 2 | 1 |
| <b>GABRB3</b> | “ “                           | Epi4K consortium, 2017 |                                                                                 |  |  |   |   |
| <b>GABRA1</b> | “ “                           | Epi4K consortium, 2017 |                                                                                 |  |  |   |   |
| <b>KCNQ2</b>  | Enriched in common epilepsies | Epi4K consortium, 2017 |                                                                                 |  |  | 1 | 3 |
| <b>GABRG2</b> | Enriched in common epilepsies | Epi4K consortium, 2017 |                                                                                 |  |  |   |   |
| <b>SCN1B</b>  | “ “                           | Epi4K consortium, 2017 |                                                                                 |  |  |   |   |
| <b>SLC6A1</b> | “ “                           | Epi4K consortium, 2017 | 1 variant in mildly affected grandmother of Dravet syndrome patients (family 6) |  |  |   |   |
| <b>EEF1A2</b> | “ “                           | Epi4K consortium, 2017 |                                                                                 |  |  |   |   |

<sup>a</sup> PHRED-scaled CADD (Combined Annotation Dependent Depletion). A score of >20 represents the top 1% deleterious substitutions in the human genome.

<sup>b</sup> Minor allele frequency; only variants with a frequency below this threshold in both the exomes and genomes in the gnomAD database are included.
